# Supplementary material for: Real-World Data in Pharmacovigilance Database Provides a New Perspective for Understanding the Risk of Clostridium difficile Infection Associated with Antibacterial Drug Exposure
Source: MDPI journal article supplement (doi:10.3390/antibiotics12071109), 2023-06-27
Supplement: s1 [file s1]

**Table S1.** Pharmacovigilance signal detection results for antibiotic associated colitis.

| Medication                        | Drug of interest with AE of interest (a) | Other drugs with AE of interest (b) | Drug of interest with Other AEs (c) | Other drugs with Other AEs (d) | ROR (95% CI)           |
|-----------------------------------|------------------------------------------|-------------------------------------|-------------------------------------|--------------------------------|------------------------|
| Tigecycline                       | 1                                        | 22                                  | 4270                                | 16,006,606                     | 170.39 (22.96–1264.43) |
| Amoxicillin                       | 2                                        | 21                                  | 57,923                              | 15,952,953                     | 26.23 (6.15–111.87)    |
| Ceftriaxone                       | 4                                        | 19                                  | 26,497                              | 15,984,379                     | 127.00 (43.20–373.34)  |
| Meropenem                         | 2                                        | 21                                  | 21,080                              | 15,989,796                     | 72.24 (16.94–308.12)   |
| Sulfamethoxazole and trimethoprim | 1                                        | 22                                  | 64,612                              | 15,946,264                     | 11.22 (1.51–83.23)     |
| Amikacin                          | 2                                        | 21                                  | 11,718                              | 15,999,158                     | 130.03 (30.49–554.65)  |
| Levofloxacin                      | 3                                        | 20                                  | 44,850                              | 15,966,026                     | 53.40 (15.87–179.71)   |
| Moxifloxacin                      | 1                                        | 22                                  | 11,961                              | 15,998,915                     | 60.80 (8.19–451.11)    |
| Vancomycin                        | 1                                        | 22                                  | 47,824                              | 15,963,052                     | 15.17 (2.04–112.57)    |
| Metronidazole                     | 3                                        | 20                                  | 51,927                              | 15,958,949                     | 46.10 (13.7–155.14)    |
| Linezolid                         | 1                                        | 22                                  | 20,439                              | 15,990,437                     | 35.56 (4.79–263.84)    |

Note: Signal detection results for no report of target drug-AE combination (a = 0) is omitted.

Abbreviations: AE, adverse event; CI, confidence interval; ROR, reporting odd ratio.

**Table S2.** Pharmacovigilance signal detection results for clostridium bacteraemia.

| Medication                                | Drug of interest with AE of interest (a) | Other drugs with AE of interest (b) | Drug of interest with Other AEs (c) | Other drugs with Other AEs (d) | ROR (95% CI)          |
|-------------------------------------------|------------------------------------------|-------------------------------------|-------------------------------------|--------------------------------|-----------------------|
| Doxycycline                               | 1                                        | 140                                 | 46,926                              | 15,963,832                     | 2.43 (0.34–17.37)     |
| Tigecycline                               | 1                                        | 140                                 | 4270                                | 16,006,488                     | 26.78 (3.74–191.47)   |
| Ampicillin                                | 1                                        | 140                                 | 6276                                | 16,004,482                     | 18.22 (2.55–130.24)   |
| Amoxicillin                               | 3                                        | 138                                 | 57,922                              | 15,952,836                     | 5.99 (1.91–18.79)     |
| Ampicillin and beta-lactamase inhibitor   | 1                                        | 140                                 | 2179                                | 16,008,579                     | 52.48 (7.34–375.33)   |
| Amoxicillin and beta-lactamase inhibitor  | 1                                        | 140                                 | 22,159                              | 15,988,599                     | 5.15 (0.72–36.85)     |
| Piperacillin and beta-lactamase inhibitor | 3                                        | 138                                 | 19,785                              | 15,990,973                     | 17.57 (5.60–55.15)    |
| Cefazolin                                 | 2                                        | 139                                 | 8561                                | 16,002,197                     | 26.89 (6.66–108.63)   |
| Cefuroxime                                | 2                                        | 139                                 | 12,229                              | 15,998,529                     | 18.82 (4.66–76.03)    |
| Cefotaxime                                | 4                                        | 137                                 | 3317                                | 16,007,441                     | 140.90 (52.11–381.02) |
| Ceftazidime                               | 3                                        | 138                                 | 5545                                | 16,005,213                     | 62.75 (19.99–197.01)  |
| Ceftriaxone                               | 5                                        | 136                                 | 26,496                              | 15,984,262                     | 22.18 (9.08–54.15)    |
| Meropenem                                 | 5                                        | 136                                 | 21,077                              | 15,989,681                     | 27.89 (11.42–68.10)   |
| Trimethoprim                              | 1                                        | 140                                 | 9131                                | 16,001,627                     | 12.52 (1.75–89.50)    |
| Sulfamethoxazole and trimethoprim         | 3                                        | 138                                 | 64610                               | 15,946,148                     | 5.37 (1.71–16.84)     |
| Clindamycin                               | 1                                        | 140                                 | 27,591                              | 15,983,167                     | 4.14 (0.58–29.58)     |
| Tobramycin                                | 1                                        | 140                                 | 19,628                              | 15,991,130                     | 5.82 (0.81–41.61)     |
| Gentamicin                                | 2                                        | 139                                 | 12517                               | 15,998,241                     | 18.39 (4.55–74.28)    |
| Amikacin                                  | 3                                        | 138                                 | 11,717                              | 15,999,041                     | 29.68 (9.46–93.18)    |
| Ofloxacin                                 | 1                                        | 140                                 | 5287                                | 16,005,471                     | 21.62 (3.02–154.62)   |
| Ciprofloxacin                             | 8                                        | 133                                 | 78,428                              | 15,932,330                     | 12.22 (5.99–24.94)    |
| Levofloxacin                              | 2                                        | 139                                 | 44,851                              | 15,965,907                     | 5.12 (1.27–20.69)     |
| Vancomycin                                | 10                                       | 131                                 | 47,815                              | 15,962,943                     | 25.48 (13.40–48.48)   |
| Metronidazole                             | 10                                       | 131                                 | 51,920                              | 15,958,838                     | 23.46 (12.33–44.64)   |
| Daptomycin                                | 1                                        | 140                                 | 11,104                              | 15,999,654                     | 10.29 (1.44–73.59)    |

Note: Signal detection results for no report of target drug-AE combination (a = 0) is omitted.

Abbreviations: AE, adverse event; CI, confidence interval; ROR, reporting odd ratio.

**Table S3.** Pharmacovigilance signal detection results for clostridium colitis.

| Medication                                | Drug of interest with AE of interest (a) | Other drugs with AE of interest (b) | Drug of interest with Other AEs (c) | Other drugs with Other AEs (d) | ROR (95% CI)         |
|-------------------------------------------|------------------------------------------|-------------------------------------|-------------------------------------|--------------------------------|----------------------|
| Doxycycline                               | 5                                        | 794                                 | 46,922                              | 15,963,178                     | 2.14 (0.89–5.16)     |
| Minocycline                               | 3                                        | 796                                 | 12,085                              | 15,998,015                     | 4.99 (1.61–15.50)    |
| Ampicillin                                | 2                                        | 797                                 | 6275                                | 16,003,825                     | 6.40 (1.60–25.64)    |
| Amoxicillin                               | 26                                       | 773                                 | 57,899                              | 15,952,201                     | 9.27 (6.27–13.70)    |
| Ampicillin and beta-lactamase inhibitor   | 7                                        | 792                                 | 2173                                | 16,007,927                     | 65.11 (30.90–137.19) |
| Amoxicillin and beta-lactamase inhibitor  | 25                                       | 774                                 | 22135                               | 15,987,965                     | 23.33 (15.66–34.75)  |
| Piperacillin and beta-lactamase inhibitor | 13                                       | 786                                 | 19,775                              | 15,990,325                     | 13.37 (7.73–23.14)   |
| Cefalexin                                 | 3                                        | 796                                 | 15,331                              | 15,994,769                     | 3.93 (1.27–12.22)    |
| Cefazolin                                 | 9                                        | 790                                 | 8554                                | 16,001,546                     | 21.31 (11.04–41.13)  |
| Cefadroxil                                | 3                                        | 796                                 | 1302                                | 16,008,798                     | 46.34 (14.89–144.18) |
| Cefuroxime                                | 8                                        | 791                                 | 12,223                              | 15,997,877                     | 13.24 (6.60–26.57)   |
| Cefotaxime                                | 12                                       | 787                                 | 3309                                | 16,006,791                     | 73.76 (41.67–130.57) |
| Ceftazidime                               | 7                                        | 792                                 | 5541                                | 16,004,559                     | 25.53 (12.12–53.75)  |
| Ceftriaxone                               | 19                                       | 780                                 | 26,482                              | 15,983,618                     | 14.7 (9.33–23.18)    |
| Cefixime                                  | 2                                        | 797                                 | 2020                                | 16,008,080                     | 19.89 (4.96–79.71)   |
| Cefdinir                                  | 1                                        | 798                                 | 5827                                | 16,004,273                     | 3.44 (0.48–24.47)    |
| Cefepime                                  | 3                                        | 796                                 | 10,981                              | 15,999,119                     | 5.49 (1.77–17.06)    |
| Aztreonam                                 | 1                                        | 798                                 | 6104                                | 16,003,996                     | 3.29 (0.46–23.36)    |
| Meropenem                                 | 17                                       | 782                                 | 21,065                              | 15,989,035                     | 16.50 (10.20–26.69)  |
| Ertapenem                                 | 4                                        | 795                                 | 5325                                | 16,004,775                     | 15.12 (5.66–40.41)   |
| Imipenem and cilastatin                   | 10                                       | 789                                 | 3421                                | 16,006,679                     | 59.30 (31.75–110.75) |
| Trimethoprim                              | 10                                       | 789                                 | 9122                                | 16,000,978                     | 22.23 (11.91–41.50)  |
| Sulfamethoxazole and trimethoprim         | 22                                       | 777                                 | 64,591                              | 15,945,509                     | 6.99 (4.58–10.68)    |
| Erythromycin                              | 12                                       | 787                                 | 14,701                              | 15,995,399                     | 16.59 (9.38–29.35)   |
| Clarithromycin                            | 20                                       | 779                                 | 26,956                              | 15,983,144                     | 15.22 (9.76–23.73)   |
| Azithromycin                              | 6                                        | 793                                 | 38,218                              | 15,971,882                     | 3.16 (1.42–7.06)     |
| Clindamycin                               | 27                                       | 772                                 | 27,565                              | 15,982,535                     | 20.28 (13.81–29.77)  |
| Tobramycin                                | 2                                        | 797                                 | 19,627                              | 15,990,473                     | 2.04 (0.51–8.19)     |
| Gentamicin                                | 15                                       | 784                                 | 12,504                              | 15,997,596                     | 24.48 (14.68–40.81)  |
| Amikacin                                  | 8                                        | 791                                 | 11,712                              | 15,998,388                     | 13.82 (6.88–27.73)   |
| Ofloxacin                                 | 2                                        | 797                                 | 5286                                | 16,004,814                     | 7.60 (1.90–30.44)    |

|                |    |     |        |            |                        |
|----------------|----|-----|--------|------------|------------------------|
| Ciprofloxacin  | 45 | 754 | 78,391 | 15,931,709 | 12.13 (8.98–16.39)     |
| Levofloxacin   | 24 | 775 | 44,829 | 15,965,271 | 11.03 (7.35–16.56)     |
| Moxifloxacin   | 2  | 797 | 11,960 | 15,998,140 | 3.36 (0.84–13.45)      |
| Gatifloxacin   | 21 | 778 | 1582   | 16,008,518 | 273.14 (176.58–422.51) |
| Vancomycin     | 59 | 740 | 47,766 | 15,962,334 | 26.64 (20.44–34.74)    |
| Polymyxin B    | 1  | 798 | 988    | 16,009,112 | 20.31 (2.85–144.47)    |
| Metronidazole  | 74 | 725 | 51,856 | 15,958,244 | 31.41 (24.72–39.90)    |
| Nitrofurantoin | 1  | 798 | 2650   | 16,007,450 | 7.57 (1.06–53.83)      |
| Fosfomycin     | 1  | 798 | 642    | 16,009,458 | 31.25 (4.39–222.46)    |
| Linezolid      | 2  | 797 | 20,438 | 15,989,662 | 1.96 (0.49–7.86)       |

Note: Signal detection results for no report of target drug-AE combination ( $a = 0$ ) is omitted.

Abbreviations: AE, adverse event; CI, confidence interval; ROR, reporting odd ratio.

**Table S4.** Pharmacovigilance signal detection results for clostridium difficile colitis.

| Medication                                | Drug of interest with AE of interest (a) | Other drugs with AE of interest (b) | Drug of interest with Other AEs (c) | Other drugs with Other AEs (d) | ROR (95% CI)        |
|-------------------------------------------|------------------------------------------|-------------------------------------|-------------------------------------|--------------------------------|---------------------|
| Doxycycline                               | 58                                       | 8187                                | 46,869                              | 15,955,785                     | 2.41 (1.86–3.12)    |
| Tetracycline                              | 1                                        | 8244                                | 372                                 | 16,002,282                     | 5.22 (0.73–37.15)   |
| Minocycline                               | 12                                       | 8233                                | 12,076                              | 15,990,578                     | 1.93 (1.10–3.40)    |
| Tigecycline                               | 40                                       | 8205                                | 4231                                | 15,998,423                     | 18.43 (13.49–25.19) |
| Combinations of tetracyclines             | 8                                        | 8237                                | 825                                 | 16,001,829                     | 18.84 (9.39–37.81)  |
| Ampicillin                                | 30                                       | 8215                                | 6247                                | 15,996,407                     | 9.35 (6.53–13.39)   |
| Amoxicillin                               | 161                                      | 8084                                | 57,764                              | 15,944,890                     | 5.50 (4.70–6.43)    |
| Benzylpenicillin                          | 4                                        | 8241                                | 1617                                | 16,001,037                     | 4.80 (1.80–12.82)   |
| Phenoxymethylpenicillin                   | 2                                        | 8243                                | 1600                                | 16,001,054                     | 2.43 (0.61–9.71)    |
| Oxacillin                                 | 4                                        | 8241                                | 899                                 | 16,001,755                     | 8.64 (3.23–23.08)   |
| Nafcillin                                 | 7                                        | 8238                                | 805                                 | 16,001,849                     | 16.89 (8.02–35.56)  |
| Ampicillin and beta-lactamase inhibitor   | 17                                       | 8228                                | 2163                                | 16,000,491                     | 15.28 (9.48–24.64)  |
| Amoxicillin and beta-lactamase inhibitor  | 135                                      | 8110                                | 22,025                              | 15,980,629                     | 12.08 (10.18–14.32) |
| Piperacillin and beta-lactamase inhibitor | 150                                      | 8095                                | 19,638                              | 15,983,016                     | 15.08 (12.82–17.74) |
| Cefalexin                                 | 53                                       | 8192                                | 15,281                              | 15,987,373                     | 6.77 (5.16–8.87)    |
| Cefazolin                                 | 60                                       | 8185                                | 8503                                | 15,994,151                     | 13.79 (10.69–17.79) |
| Cefadroxil                                | 3                                        | 8242                                | 1302                                | 16,001,352                     | 4.47 (1.44–13.89)   |
| Cefoxitin                                 | 3                                        | 8242                                | 961                                 | 16,001,693                     | 6.06 (1.95–18.83)   |
| Cefuroxime                                | 92                                       | 8153                                | 12,139                              | 15,990,515                     | 14.86 (12.09–18.27) |
| Cefaclor                                  | 2                                        | 8243                                | 1189                                | 16,001,465                     | 3.27 (0.82–13.07)   |
| Cefotetan                                 | 1                                        | 8244                                | 102                                 | 16,002,552                     | 19.03 (2.65–136.42) |
| Cefprozil                                 | 4                                        | 8241                                | 616                                 | 16,002,038                     | 12.61 (4.72–33.71)  |
| Cefotaxime                                | 28                                       | 8217                                | 3293                                | 15,999,361                     | 16.56 (11.41–24.03) |
| Ceftazidime                               | 46                                       | 8199                                | 5502                                | 15,997,152                     | 16.31 (12.19–21.82) |
| Ceftriaxone                               | 169                                      | 8076                                | 26,332                              | 15,976,322                     | 12.70 (10.90–14.79) |
| Cefixime                                  | 17                                       | 8228                                | 2005                                | 16,000,649                     | 16.49 (10.22–26.59) |
| Cefpodoxime                               | 12                                       | 8233                                | 712                                 | 16,001,942                     | 32.76 (18.51–57.98) |
| Cefdinir                                  | 25                                       | 8220                                | 5803                                | 15,996,851                     | 8.38 (5.66–12.43)   |
| Ceftazidime and beta-lactamase inhibitor  | 1                                        | 8244                                | 126                                 | 16,002,528                     | 15.41 (2.15–110.24) |
| Cefepime                                  | 121                                      | 8124                                | 10,863                              | 15,991,791                     | 21.93 (18.31–26.26) |

|                                          |     |      |        |            |                     |
|------------------------------------------|-----|------|--------|------------|---------------------|
| Aztreonam                                | 14  | 8231 | 6091   | 15,996,563 | 4.47 (2.64–7.55)    |
| Meropenem                                | 183 | 8062 | 20,899 | 15,981,755 | 17.36 (14.98–20.11) |
| Ertapenem                                | 44  | 8201 | 5285   | 15,997,369 | 16.24 (12.06–21.87) |
| Imipenem and cilastatin                  | 28  | 8217 | 3403   | 15,999,251 | 16.02 (11.04–23.25) |
| Ceftaroline fosamil                      | 1   | 8244 | 505    | 16,002,149 | 3.84 (0.54–27.34)   |
| Cefiderocol                              | 1   | 8244 | 112    | 16,002,542 | 17.33 (2.42–124.13) |
| Ceftolozane and beta-lactamase inhibitor | 1   | 8244 | 755    | 16,001,899 | 2.57 (0.36–18.28)   |
| Trimethoprim                             | 19  | 8226 | 9113   | 15,993,541 | 4.05 (2.58–6.36)    |
| Sulfamethoxazole and trimethoprim        | 170 | 8075 | 64,443 | 15,938,211 | 5.21 (4.47–6.06)    |
| Erythromycin                             | 30  | 8215 | 14,683 | 15,987,971 | 3.98 (2.78–5.69)    |
| Clarithromycin                           | 65  | 8180 | 26,911 | 15,975,743 | 4.72 (3.69–6.02)    |
| Azithromycin                             | 78  | 8167 | 38,146 | 15,964,508 | 4 (3.20–5.00)       |
| Clindamycin                              | 211 | 8034 | 27,381 | 15,975,273 | 15.32 (13.36–17.58) |
| Lincomycin                               | 1   | 8244 | 236    | 16,002,418 | 8.22 (1.15–58.64)   |
| Quinupristin/dalfopristin                | 1   | 8244 | 103    | 16,002,551 | 18.85 (2.63–135.08) |
| Streptomycin                             | 2   | 8243 | 1004   | 16,001,650 | 3.87 (0.97–15.49)   |
| Tobramycin                               | 22  | 8223 | 19,607 | 15,983,047 | 2.18 (1.43–3.31)    |
| Gentamicin                               | 44  | 8201 | 12,475 | 15,990,179 | 6.88 (5.11–9.25)    |
| Amikacin                                 | 64  | 8181 | 11,656 | 15,990,998 | 10.73 (8.39–13.73)  |
| Ofloxacin                                | 10  | 8235 | 5278   | 15,997,376 | 3.68 (1.98–6.85)    |
| Ciprofloxacin                            | 416 | 7829 | 78,020 | 15,924,634 | 10.85 (9.82–11.97)  |
| Levofloxacin                             | 169 | 8076 | 44,684 | 15,957,970 | 7.47 (6.42–8.71)    |
| Moxifloxacin                             | 30  | 8215 | 11,932 | 15,990,722 | 4.89 (3.42–7.01)    |
| Gatifloxacin                             | 5   | 8240 | 1598   | 16,001,056 | 6.08 (2.52–14.62)   |
| Delafoxacin                              | 1   | 8244 | 218    | 16,002,436 | 8.90 (1.25–63.51)   |
| Vancomycin                               | 509 | 7736 | 47,316 | 15,955,338 | 22.19 (20.27–24.28) |
| Dalbavancin                              | 2   | 8243 | 556    | 16,002,098 | 6.98 (1.74–28.00)   |
| Colistin                                 | 7   | 8238 | 960    | 16,001,694 | 14.16 (6.73–29.8)   |
| Polymyxin B                              | 6   | 8239 | 983    | 16,001,671 | 11.85 (5.31–26.46)  |
| Metronidazole                            | 620 | 7625 | 51,310 | 15,951,344 | 25.28 (23.28–27.45) |
| Tinidazole                               | 2   | 8243 | 359    | 16,002,295 | 10.82 (2.69–43.42)  |
| Nitrofurantoin                           | 3   | 8242 | 2648   | 16,000,006 | 2.20 (0.71–6.83)    |
| Fosfomycin                               | 4   | 8241 | 639    | 16,002,015 | 12.15 (4.55–32.49)  |
| Linezolid                                | 78  | 8167 | 20,362 | 15,982,292 | 7.50 (6.00–9.37)    |
| Daptomycin                               | 27  | 8218 | 11,078 | 15,991,576 | 4.74 (3.25–6.92)    |
| Tedizolid                                | 1   | 8244 | 501    | 16,002,153 | 3.87 (0.54–27.56)   |

Note: Signal detection results for no report of target drug-AE combination (a = 0) is omitted.

Abbreviations: AE, adverse event; CI, confidence interval; ROR, reporting odd ratio.

**Table S5.** Pharmacovigilance signal detection results for clostridium difficile infection.

| Medication                                | Drug of interest with AE of interest (a) | Other drugs with AE of interest (b) | Drug of interest with Other AEs (c) | Other drugs with Other AEs (d) | ROR (95% CI)        |
|-------------------------------------------|------------------------------------------|-------------------------------------|-------------------------------------|--------------------------------|---------------------|
| Doxycycline                               | 141                                      | 15655                               | 46,786                              | 15,948,317                     | 3.07 (2.60–3.62)    |
| Tetracycline                              | 1                                        | 15795                               | 372                                 | 15,994,731                     | 2.72 (0.38–19.38)   |
| Minocycline                               | 10                                       | 15786                               | 12,078                              | 15,983,025                     | 0.84 (0.45–1.56)    |
| Tigecycline                               | 22                                       | 15774                               | 4249                                | 15,990,854                     | 5.25 (3.45–7.98)    |
| Combinations of tetracyclines             | 8                                        | 15788                               | 825                                 | 15,994,278                     | 9.82 (4.90–19.71)   |
| Ampicillin                                | 22                                       | 15774                               | 6255                                | 15,988,848                     | 3.57 (2.35–5.42)    |
| Amoxicillin                               | 277                                      | 15519                               | 57,648                              | 15,937,455                     | 4.93 (4.38–5.56)    |
| Benzylpenicillin                          | 2                                        | 15794                               | 1619                                | 15,993,484                     | 1.25 (0.31–5.01)    |
| Phenoxymethylpenicillin                   | 7                                        | 15789                               | 1595                                | 15,993,508                     | 4.45 (2.12–9.34)    |
| Dicloxacillin                             | 1                                        | 15795                               | 116                                 | 15,994,987                     | 8.73 (1.22–62.5)    |
| Oxacillin                                 | 6                                        | 15790                               | 897                                 | 15,994,206                     | 6.78 (3.04–15.12)   |
| Nafcillin                                 | 1                                        | 15795                               | 811                                 | 15,994,292                     | 1.25 (0.18–8.88)    |
| Ampicillin and beta-lactamase inhibitor   | 5                                        | 15791                               | 2175                                | 15,992,928                     | 2.33 (0.97–5.60)    |
| Amoxicillin and beta-lactamase inhibitor  | 113                                      | 15683                               | 22,047                              | 15,973,056                     | 5.22 (4.34–6.28)    |
| Piperacillin and beta-lactamase inhibitor | 160                                      | 15636                               | 19,628                              | 15,975,475                     | 8.33 (7.12–9.74)    |
| Cefalexin                                 | 61                                       | 15735                               | 15,273                              | 15,979,830                     | 4.06 (3.15–5.22)    |
| Cefazolin                                 | 49                                       | 15747                               | 8514                                | 15,986,589                     | 5.84 (4.41–7.74)    |
| Cefadroxil                                | 6                                        | 15790                               | 1299                                | 15,993,804                     | 4.68 (2.10–10.43)   |
| Cefoxitin                                 | 2                                        | 15794                               | 962                                 | 15,994,141                     | 2.11 (0.53–8.43)    |
| Cefuroxime                                | 133                                      | 15663                               | 12,098                              | 15,983,005                     | 11.22 (9.45–13.32)  |
| Cefaclor                                  | 25                                       | 15771                               | 1166                                | 15,993,937                     | 21.74 (14.63–32.32) |
| Cefotetan                                 | 1                                        | 15795                               | 102                                 | 15,995,001                     | 9.93 (1.39–71.17)   |
| Cefprozil                                 | 7                                        | 15789                               | 613                                 | 15,994,490                     | 11.57 (5.49–24.37)  |
| Cefotaxime                                | 12                                       | 15784                               | 3309                                | 15,991,794                     | 3.67 (2.08–6.48)    |
| Ceftazidime                               | 37                                       | 15759                               | 5511                                | 15,989,592                     | 6.81 (4.93–9.42)    |
| Ceftriaxone                               | 192                                      | 15604                               | 26,309                              | 15,968,794                     | 7.47 (6.47–8.62)    |
| Cefixime                                  | 17                                       | 15779                               | 2005                                | 15,993,098                     | 8.59 (5.33–13.86)   |
| Cefpodoxime                               | 4                                        | 15792                               | 720                                 | 15,994,383                     | 5.63 (2.11–15.03)   |
| Cefdinir                                  | 45                                       | 15751                               | 5783                                | 15,989,320                     | 7.90 (5.89–10.60)   |
| Cefepime                                  | 98                                       | 15698                               | 10,886                              | 15,984,217                     | 9.17 (7.51–11.19)   |
| Aztreonam                                 | 17                                       | 15779                               | 6088                                | 15,989,015                     | 2.83 (1.76–4.56)    |

|                                          |     |       |        |            |                     |
|------------------------------------------|-----|-------|--------|------------|---------------------|
| Meropenem                                | 180 | 15616 | 20,902 | 15,974,201 | 8.81 (7.60–10.21)   |
| Ertapenem                                | 85  | 15711 | 5244   | 15,989,859 | 16.5 (13.31–20.45)  |
| Imipenem and cilastatin                  | 15  | 15781 | 3416   | 15,991,687 | 4.45 (2.68–7.39)    |
| Ceftaroline fosamil                      | 3   | 15793 | 503    | 15,994,600 | 6.04 (1.94–18.79)   |
| Ceftolozane and beta-lactamase inhibitor | 5   | 15791 | 751    | 15,994,352 | 6.74 (2.80–16.25)   |
| Trimethoprim                             | 98  | 15698 | 9034   | 15,986,069 | 11.05 (9.05–13.49)  |
| Sulfadiazine                             | 4   | 15792 | 1252   | 15,993,851 | 3.24 (1.21–8.64)    |
| Sulfamethoxazole and trimethoprim        | 184 | 15612 | 64,429 | 15,930,674 | 2.91 (2.52–3.37)    |
| Erythromycin                             | 39  | 15757 | 14,674 | 15,980,429 | 2.7 (1.97–3.69)     |
| Clarithromycin                           | 131 | 15665 | 26,845 | 15,968,258 | 4.97 (4.19–5.91)    |
| Azithromycin                             | 44  | 15752 | 38,180 | 15,956,923 | 1.17 (0.87–1.57)    |
| Clindamycin                              | 398 | 15398 | 27,194 | 15,967,909 | 15.18 (13.73–16.78) |
| Lincomycin                               | 3   | 15793 | 234    | 15,994,869 | 12.98 (4.16–40.56)  |
| Quinupristin/dalfopristin                | 1   | 15795 | 103    | 15,995,000 | 9.83 (1.37–70.47)   |
| Tobramycin                               | 26  | 15770 | 19,603 | 15,975,500 | 1.34 (0.91–1.97)    |
| Gentamicin                               | 96  | 15700 | 12,423 | 15,982,680 | 7.87 (6.43–9.62)    |
| Amikacin                                 | 30  | 15766 | 11,690 | 15,983,413 | 2.60 (1.82–3.72)    |
| Ofloxacin                                | 19  | 15777 | 5269   | 15,989,834 | 3.65 (2.33–5.74)    |
| Ciprofloxacin                            | 506 | 15290 | 77,930 | 15,917,173 | 6.76 (6.18–7.39)    |
| Levofloxacin                             | 213 | 15583 | 44,640 | 15,950,463 | 4.88 (4.26–5.59)    |
| Moxifloxacin                             | 26  | 15770 | 11,936 | 15,983,167 | 2.21 (1.50–3.24)    |
| Vancomycin                               | 943 | 14853 | 46,882 | 15,948,221 | 21.60 (20.21–23.08) |
| Telavancin                               | 1   | 15795 | 116    | 15,994,987 | 8.73 (1.22–62.50)   |
| Dalbavancin                              | 2   | 15794 | 556    | 15,994,547 | 3.64 (0.91–14.60)   |
| Oritavancin                              | 1   | 15795 | 791    | 15,994,312 | 1.28 (0.18–9.10)    |
| Metronidazole                            | 939 | 14857 | 50,991 | 15,944,112 | 19.76 (18.49–21.12) |
| Tinidazole                               | 2   | 15794 | 359    | 15,994,744 | 5.64 (1.41–22.65)   |
| Nitrofurantoin                           | 5   | 15791 | 2646   | 15,992,457 | 1.91 (0.8–4.60)     |
| Fosfomycin                               | 3   | 15793 | 640    | 15,994,463 | 4.75 (1.53–14.76)   |
| Linezolid                                | 36  | 15760 | 20,404 | 15,974,699 | 1.79 (1.29–2.48)    |
| Daptomycin                               | 20  | 15776 | 11,085 | 15,984,018 | 1.83 (1.18–2.84)    |
| Tedizolid                                | 1   | 15795 | 501    | 15,994,602 | 2.02 (0.28–14.38)   |

Note: Signal detection results for no report of target drug-AE combination (a = 0) is omitted.

Abbreviations: AE, adverse event; CI, confidence interval; ROR, reporting odd ratio.



**Table S6.** Pharmacovigilance signal detection results for clostridial infection.

| Medication                                | Drug of interest with AE of interest (a) | Other drugs with AE of interest (b) | Drug of interest with Other AEs (c) | Other drugs with Other AEs (d) | ROR (95% CI)        |
|-------------------------------------------|------------------------------------------|-------------------------------------|-------------------------------------|--------------------------------|---------------------|
| Doxycycline                               | 16                                       | 3001                                | 46,911                              | 15,960,971                     | 1.81 (1.11–2.97)    |
| Minocycline                               | 2                                        | 3015                                | 12,086                              | 15,995,796                     | 0.88 (0.22–3.51)    |
| Tigecycline                               | 8                                        | 3009                                | 4263                                | 16,003,619                     | 9.98 (4.98–19.99)   |
| Combinations of tetracyclines             | 2                                        | 3015                                | 831                                 | 16,007,051                     | 12.78 (3.19–51.2)   |
| Ampicillin                                | 14                                       | 3003                                | 6263                                | 16,001,619                     | 11.91 (7.04–20.15)  |
| Amoxicillin                               | 31                                       | 2986                                | 57,894                              | 15,949,988                     | 2.86 (2.01–4.07)    |
| Benzylpenicillin                          | 1                                        | 3016                                | 1620                                | 16,006,262                     | 3.28 (0.46–23.28)   |
| Oxacillin                                 | 1                                        | 3016                                | 902                                 | 16,006,980                     | 5.88 (0.83–41.83)   |
| Nafcillin                                 | 1                                        | 3016                                | 811                                 | 16,007,071                     | 6.54 (0.92–46.53)   |
| Ampicillin and beta-lactamase inhibitor   | 7                                        | 3010                                | 2173                                | 16,005,709                     | 17.13 (8.15–36.01)  |
| Amoxicillin and beta-lactamase inhibitor  | 24                                       | 2993                                | 22,136                              | 15,985,746                     | 5.79 (3.87–8.66)    |
| Piperacillin and beta-lactamase inhibitor | 55                                       | 2962                                | 19,733                              | 15,988,149                     | 15.04 (11.52–19.65) |
| Cefalexin                                 | 18                                       | 2999                                | 15,316                              | 15,992,566                     | 6.27 (3.94–9.96)    |
| Cefazolin                                 | 14                                       | 3003                                | 8549                                | 15,999,333                     | 8.72 (5.16–14.76)   |
| Cefoxitin                                 | 1                                        | 3016                                | 963                                 | 16,006,919                     | 5.51 (0.78–39.18)   |
| Cefuroxime                                | 26                                       | 2991                                | 12,205                              | 15,995,677                     | 11.39 (7.74–16.77)  |
| Cefaclor                                  | 1                                        | 3016                                | 1190                                | 16,006,692                     | 4.46 (0.63–31.7)    |
| Cefotaxime                                | 5                                        | 3012                                | 3316                                | 16,004,566                     | 8.01 (3.33–19.28)   |
| Ceftazidime                               | 12                                       | 3005                                | 5536                                | 16,002,346                     | 11.54 (6.54–20.36)  |
| Ceftriaxone                               | 43                                       | 2974                                | 26,458                              | 15,981,424                     | 8.73 (6.46–11.8)    |
| Cefpodoxime                               | 3                                        | 3014                                | 721                                 | 16,007,161                     | 22.1 (7.11–68.72)   |
| Cefdinir                                  | 12                                       | 3005                                | 5816                                | 16,002,066                     | 10.99 (6.23–19.38)  |
| Cefepime                                  | 23                                       | 2994                                | 10,961                              | 15,996,921                     | 11.21 (7.44–16.91)  |
| Aztreonam                                 | 1                                        | 3016                                | 6104                                | 16,001,778                     | 0.87 (0.12–6.17)    |
| Meropenem                                 | 34                                       | 2983                                | 21,048                              | 15,986,834                     | 8.66 (6.17–12.14)   |
| Ertapenem                                 | 11                                       | 3006                                | 5318                                | 16,002,564                     | 11.01 (6.09–19.92)  |
| Imipenem and cilastatin                   | 14                                       | 3003                                | 3417                                | 16,004,465                     | 21.84 (12.9–36.95)  |
| Ceftolozane and beta-lactamase inhibitor  | 1                                        | 3016                                | 755                                 | 16,007,127                     | 7.03 (0.99–49.99)   |
| Trimethoprim                              | 12                                       | 3005                                | 9120                                | 15,998,762                     | 7.01 (3.97–12.35)   |
| Sulfamethoxazole and                      | 43                                       | 2974                                | 64,570                              | 15,943,312                     | 3.57 (2.64–4.82)    |

|                |     |      |        |            |                     |
|----------------|-----|------|--------|------------|---------------------|
| trimethoprim   |     |      |        |            |                     |
| Erythromycin   | 9   | 3008 | 14,704 | 15,993,178 | 3.25 (1.69–6.26)    |
| Clarithromycin | 16  | 3001 | 26,960 | 15,980,922 | 3.16 (1.93–5.17)    |
| Azithromycin   | 26  | 2991 | 38,198 | 15,969,684 | 3.63 (2.47–5.35)    |
| Clindamycin    | 76  | 2941 | 27,516 | 15,980,366 | 15.01 (11.95–18.85) |
| Tobramycin     | 4   | 3013 | 19,625 | 15,988,257 | 1.08 (0.41–2.88)    |
| Gentamicin     | 22  | 2995 | 12,497 | 15,995,385 | 9.40 (6.18–14.31)   |
| Amikacin       | 17  | 3000 | 11,703 | 15,996,179 | 7.75 (4.81–12.48)   |
| Ciprofloxacin  | 89  | 2928 | 78,347 | 15,929,535 | 6.18 (5.00–7.63)    |
| Levofloxacin   | 55  | 2962 | 44,798 | 15,963,084 | 6.62 (5.07–8.64)    |
| Moxifloxacin   | 6   | 3011 | 11,956 | 15,995,926 | 2.67 (1.20–5.94)    |
| Gatifloxacin   | 7   | 3010 | 1596   | 16,006,286 | 23.32 (11.09–49.05) |
| Vancomycin     | 108 | 2909 | 47,717 | 15,960,165 | 12.42 (10.25–15.05) |
| Colistin       | 2   | 3015 | 965    | 16,006,917 | 11.00 (2.75–44.08)  |
| Polymyxin B    | 2   | 3015 | 987    | 16,006,895 | 10.76 (2.69–43.1)   |
| Metronidazole  | 171 | 2846 | 51,759 | 15,956,123 | 18.52 (15.87–21.62) |
| Nitrofurantoin | 4   | 3013 | 2647   | 16,005,235 | 8.03 (3.01–21.42)   |
| Linezolid      | 21  | 2996 | 20,419 | 15,987,463 | 5.49 (3.57–8.43)    |
| Daptomycin     | 8   | 3009 | 11,097 | 15,996,785 | 3.83 (1.91–7.67)    |

Note: Signal detection results for no report of target drug-AE combination ( $a = 0$ ) is omitted.

Abbreviations: AE, adverse event; CI, confidence interval; ROR, reporting odd ratio.

**Table S7.** Pharmacovigilance signal detection results for clostridial sepsis.

| Medication                                | Drug of interest with AE of interest (a) | Other drugs with AE of interest (b) | Drug of interest with Other AEs (c) | Other drugs with Other AEs (d) | ROR (95% CI)           |
|-------------------------------------------|------------------------------------------|-------------------------------------|-------------------------------------|--------------------------------|------------------------|
| Doxycycline                               | 1                                        | 141                                 | 46,926                              | 15,963,831                     | 2.41 (0.34–17.25)      |
| Amoxicillin                               | 1                                        | 141                                 | 57,924                              | 15,952,833                     | 1.95 (0.27–13.96)      |
| Oxacillin                                 | 1                                        | 141                                 | 902                                 | 16,009,855                     | 125.88 (17.59–900.87)  |
| Piperacillin and beta-lactamase inhibitor | 4                                        | 138                                 | 19,784                              | 15,990,973                     | 23.43 (8.67–63.32)     |
| Cefazolin                                 | 1                                        | 141                                 | 8562                                | 16,002,195                     | 13.26 (1.85–94.77)     |
| Ceftazidime                               | 2                                        | 140                                 | 5546                                | 16,005,211                     | 41.23 (10.21–166.52)   |
| Ceftriaxone                               | 6                                        | 136                                 | 26,495                              | 15,984,262                     | 26.62 (11.75–60.29)    |
| Cefdinir                                  | 1                                        | 141                                 | 5827                                | 16,004,930                     | 19.48 (2.72–139.28)    |
| Meropenem                                 | 9                                        | 133                                 | 21,073                              | 15,989,684                     | 51.35 (26.14–100.87)   |
| Ertapenem                                 | 2                                        | 140                                 | 5327                                | 16,005,430                     | 42.92 (10.63–173.37)   |
| Trimethoprim                              | 3                                        | 139                                 | 9129                                | 16,001,628                     | 37.83 (12.05–118.76)   |
| Clindamycin                               | 4                                        | 138                                 | 27,588                              | 15,983,169                     | 16.79 (6.21–45.38)     |
| Lincomycin                                | 1                                        | 141                                 | 236                                 | 16,010,521                     | 481.14 (67.03–3453.82) |
| Amikacin                                  | 1                                        | 141                                 | 11,719                              | 15,999,038                     | 9.68 (1.35–69.22)      |
| Ciprofloxacin                             | 4                                        | 138                                 | 78,432                              | 15,932,325                     | 5.89 (2.18–15.91)      |
| Levofloxacin                              | 6                                        | 136                                 | 44,847                              | 15,965,910                     | 15.71 (6.93–35.58)     |
| Vancomycin                                | 9                                        | 133                                 | 47,816                              | 15,962,941                     | 22.59 (11.50–44.38)    |
| Metronidazole                             | 1                                        | 141                                 | 51,929                              | 15,958,828                     | 2.18 (0.30–15.58)      |
| Nitrofurantoin                            | 1                                        | 141                                 | 2650                                | 16,008,107                     | 42.84 (5.99–306.38)    |
| Linezolid                                 | 5                                        | 137                                 | 20,435                              | 15,990,322                     | 28.56 (11.7–69.72)     |
| Daptomycin                                | 1                                        | 141                                 | 11,104                              | 15,999,653                     | 10.22 (1.43–73.06)     |

Note: Signal detection results for no report of target drug-AE combination (a = 0) is omitted.

Abbreviations: AE, adverse event; CI, confidence interval; ROR, reporting odd ratio.

**Table S8.** Pharmacovigilance signal detection results for clostridium test positive.

| Medication                                | Drug of interest with AE of interest (a) | Other drugs with AE of interest (b) | Drug of interest with Other AEs (c) | Other drugs with Other AEs (d) | ROR (95% CI)        |
|-------------------------------------------|------------------------------------------|-------------------------------------|-------------------------------------|--------------------------------|---------------------|
| Doxycycline                               | 3                                        | 1397                                | 46,924                              | 15,962,575                     | 0.73 (0.24–2.27)    |
| Tigecycline                               | 2                                        | 1398                                | 4269                                | 16,005,230                     | 5.36 (1.34–21.47)   |
| Ampicillin                                | 3                                        | 1397                                | 6274                                | 16,003,225                     | 5.48 (1.76–17.01)   |
| Amoxicillin                               | 28                                       | 1372                                | 57,897                              | 15,951,602                     | 5.62 (3.87–8.18)    |
| Benzympenicillin                          | 2                                        | 1398                                | 1619                                | 16,007,880                     | 14.15 (3.53–56.66)  |
| Phenoxymethylpenicillin                   | 1                                        | 1399                                | 1601                                | 16,007,898                     | 7.15 (1.01–50.81)   |
| Nafcillin                                 | 1                                        | 1399                                | 811                                 | 16,008,688                     | 14.11 (1.98–100.36) |
| Ampicillin and beta-lactamase inhibitor   | 9                                        | 1391                                | 2171                                | 16,007,328                     | 47.71 (24.74–92.01) |
| Amoxicillin and beta-lactamase inhibitor  | 18                                       | 1382                                | 22,142                              | 15,987,357                     | 9.4 (5.91–14.97)    |
| Piperacillin and beta-lactamase inhibitor | 63                                       | 1337                                | 19,725                              | 15,989,774                     | 38.20 (29.66–49.20) |
| Cefalexin                                 | 14                                       | 1386                                | 15,320                              | 15,994,179                     | 10.55 (6.23–17.86)  |
| Cefazolin                                 | 12                                       | 1388                                | 8551                                | 16,000,948                     | 16.18 (9.16–28.57)  |
| Cefoxitin                                 | 1                                        | 1399                                | 963                                 | 16,008,536                     | 11.88 (1.67–84.50)  |
| Cefuroxime                                | 30                                       | 1370                                | 12,201                              | 15,997,298                     | 28.71 (19.99–41.24) |
| Cefaclor                                  | 2                                        | 1398                                | 1189                                | 16,008,310                     | 19.26 (4.81–77.18)  |
| Cefotaxime                                | 1                                        | 1399                                | 3320                                | 16,006,179                     | 3.45 (0.48–24.49)   |
| Ceftazidime                               | 8                                        | 1392                                | 5540                                | 16,003,959                     | 16.6 (8.28–33.28)   |
| Ceftriaxone                               | 68                                       | 1332                                | 26,433                              | 15,983,066                     | 30.87 (24.19–39.4)  |
| Cefixime                                  | 6                                        | 1394                                | 2016                                | 16,007,483                     | 34.18 (15.31–76.29) |
| Cefpodoxime                               | 1                                        | 1399                                | 723                                 | 16,008,776                     | 15.83 (2.22–112.59) |
| Cefdinir                                  | 5                                        | 1395                                | 5823                                | 16,003,676                     | 9.85 (4.09–23.71)   |
| Cefepime                                  | 25                                       | 1375                                | 10,959                              | 15,998,540                     | 26.54 (17.86–39.44) |
| Aztreonam                                 | 4                                        | 1396                                | 6101                                | 16,003,398                     | 7.52 (2.82–20.06)   |
| Meropenem                                 | 50                                       | 1350                                | 21,032                              | 15,988,467                     | 28.16 (21.22–37.35) |
| Ertapenem                                 | 31                                       | 1369                                | 5298                                | 16,004,201                     | 68.4 (47.87–97.75)  |
| Imipenem and cilastatin                   | 12                                       | 1388                                | 3419                                | 16,006,080                     | 40.47 (22.91–71.51) |
| Ceftaroline fosamil                       | 1                                        | 1399                                | 505                                 | 16,008,994                     | 22.66 (3.18–161.29) |
| Trimethoprim                              | 23                                       | 1377                                | 9109                                | 16,000,390                     | 29.34 (19.42–44.32) |
| Sulfamethoxazole and trimethoprim         | 28                                       | 1372                                | 64,585                              | 15,944,914                     | 5.04 (3.47–7.33)    |
| Erythromycin                              | 14                                       | 1386                                | 14,699                              | 15,994,800                     | 10.99 (6.49–18.61)  |
| Clarithromycin                            | 19                                       | 1381                                | 26,957                              | 15,982,542                     | 8.16 (5.19–12.83)   |

|               |     |      |        |            |                     |
|---------------|-----|------|--------|------------|---------------------|
| Azithromycin  | 8   | 1392 | 38,216 | 15,971,283 | 2.40 (1.20–4.81)    |
| Clindamycin   | 56  | 1344 | 27,536 | 15,981,963 | 24.18 (18.51–31.60) |
| Streptomycin  | 1   | 1399 | 1005   | 16,008,494 | 11.39 (1.60–80.97)  |
| Tobramycin    | 3   | 1397 | 19,626 | 15,989,873 | 1.75 (0.56–5.43)    |
| Gentamicin    | 15  | 1385 | 12,504 | 15,996,995 | 13.86 (8.33–23.05)  |
| Amikacin      | 11  | 1389 | 11,709 | 15,997,790 | 10.82 (5.98–19.59)  |
| Ciprofloxacin | 61  | 1339 | 78,375 | 15,931,124 | 9.26 (7.16–11.97)   |
| Levofloxacin  | 24  | 1376 | 44,829 | 15,964,670 | 6.21 (4.15–9.30)    |
| Moxifloxacin  | 5   | 1395 | 11,957 | 15,997,542 | 4.80 (1.99–11.54)   |
| Vancomycin    | 109 | 1291 | 47,716 | 15,961,783 | 28.24 (23.22–34.35) |
| Colistin      | 2   | 1398 | 965    | 16,008,534 | 23.73 (5.92–95.13)  |
| Polymyxin B   | 2   | 1398 | 987    | 16,008,512 | 23.20 (5.79–93.00)  |
| Metronidazole | 108 | 1292 | 51,822 | 15,957,677 | 25.74 (21.15–31.33) |
| Linezolid     | 18  | 1382 | 20,422 | 15,989,077 | 10.20 (6.40–16.24)  |
| Daptomycin    | 5   | 1395 | 11,100 | 15,998,399 | 5.17 (2.15–12.43)   |

Note: Signal detection results for no report of target drug-AE combination (a = 0) is omitted.

Abbreviations: AE, adverse event; CI, confidence interval; ROR, reporting odd ratio.

**Table S9.** Pharmacovigilance signal detection results for gastroenteritis clostridial.

| Medication                                | Drug of interest with AE of interest (a) | Other drugs with AE of interest (b) | Drug of interest with Other AEs (c) | Other drugs with Other AEs (d) | ROR (95% CI)        |
|-------------------------------------------|------------------------------------------|-------------------------------------|-------------------------------------|--------------------------------|---------------------|
| Doxycycline                               | 1                                        | 280                                 | 46,926                              | 15,963,692                     | 1.21 (0.17–8.66)    |
| Amoxicillin                               | 8                                        | 273                                 | 57,917                              | 15,952,701                     | 8.07 (4.00–16.30)   |
| Amoxicillin and beta-lactamase inhibitor  | 4                                        | 277                                 | 22,156                              | 15,988,462                     | 10.42 (3.88–27.96)  |
| Piperacillin and beta-lactamase inhibitor | 8                                        | 273                                 | 19,780                              | 15,990,838                     | 23.69 (11.73–47.86) |
| Cefuroxime                                | 7                                        | 274                                 | 12,224                              | 15,998,394                     | 33.44 (15.79–70.81) |
| Cefaclor                                  | 1                                        | 280                                 | 1190                                | 16,009,428                     | 48.05 (6.74–342.58) |
| Ceftazidime                               | 3                                        | 278                                 | 5545                                | 16,005,073                     | 31.15 (9.98–97.20)  |
| Ceftriaxone                               | 16                                       | 265                                 | 26,485                              | 15,984,133                     | 36.44 (22.00–60.36) |
| Cefepime                                  | 2                                        | 279                                 | 10,982                              | 15,999,636                     | 10.44 (2.60–41.97)  |
| Meropenem                                 | 2                                        | 279                                 | 21,080                              | 15,989,538                     | 5.44 (1.35–21.85)   |
| Ertapenem                                 | 1                                        | 280                                 | 5328                                | 16,005,290                     | 10.73 (1.51–76.45)  |
| Imipenem and cilastatin                   | 2                                        | 279                                 | 3429                                | 16,007,189                     | 33.46 (8.32–134.53) |
| Sulfamethoxazole and trimethoprim         | 2                                        | 279                                 | 64,611                              | 15,946,007                     | 1.77 (0.44–7.11)    |
| Clarithromycin                            | 7                                        | 274                                 | 26,969                              | 15,983,649                     | 15.14 (7.15–32.06)  |
| Azithromycin                              | 2                                        | 279                                 | 38,222                              | 15,972,396                     | 3 (0.75–12.04)      |
| Clindamycin                               | 3                                        | 278                                 | 27,589                              | 15,983,029                     | 6.25 (2.00–19.50)   |
| Tobramycin                                | 1                                        | 280                                 | 19,628                              | 15,990,990                     | 2.91 (0.41–20.73)   |
| Amikacin                                  | 1                                        | 280                                 | 11,719                              | 15,998,899                     | 4.88 (0.68–34.74)   |
| Ciprofloxacin                             | 13                                       | 268                                 | 78,423                              | 15,932,195                     | 9.85 (5.65–17.20)   |
| Levofloxacin                              | 9                                        | 272                                 | 44,844                              | 15,965,774                     | 11.78 (6.06–22.89)  |
| Moxifloxacin                              | 1                                        | 280                                 | 11,961                              | 15,998,657                     | 4.78 (0.67–34.04)   |
| Vancomycin                                | 10                                       | 271                                 | 47,815                              | 15,962,803                     | 12.32 (6.55–23.16)  |
| Metronidazole                             | 9                                        | 272                                 | 51,921                              | 15,958,697                     | 10.17 (5.23–19.76)  |
| Linezolid                                 | 2                                        | 279                                 | 20,438                              | 15,990,180                     | 5.61 (1.40–22.54)   |
| Daptomycin                                | 4                                        | 277                                 | 11,101                              | 15,999,517                     | 20.81 (7.75–55.86)  |

Note: Signal detection results for no report of target drug-AE combination (a = 0) is omitted.

Abbreviations: AE, adverse event; CI, confidence interval; ROR, reporting odd ratio.

**Table S10.** Pharmacovigilance signal detection results for pseudomembranous colitis.

| Medication                                | Drug of interest with AE of interest (a) | Other drugs with AE of interest (b) | Drug of interest with Other AEs (c) | Other drugs with Other AEs (d) | ROR (95% CI)          |
|-------------------------------------------|------------------------------------------|-------------------------------------|-------------------------------------|--------------------------------|-----------------------|
| Doxycycline                               | 9                                        | 1909                                | 46,918                              | 15,962,063                     | 1.6 (0.83–3.09)       |
| Minocycline                               | 7                                        | 1911                                | 12,081                              | 15,996,900                     | 4.85 (2.31–10.19)     |
| Tigecycline                               | 9                                        | 1909                                | 4262                                | 16,004,719                     | 17.7 (9.19–34.1)      |
| Combinations of tetracyclines             | 2                                        | 1916                                | 831                                 | 16,008,150                     | 20.11 (5.02–80.6)     |
| Chloramphenicol                           | 1                                        | 1917                                | 26                                  | 16,008,955                     | 321.19 (43.56–2368.2) |
| Ampicillin                                | 22                                       | 1896                                | 6255                                | 16,002,726                     | 29.69 (19.49–45.23)   |
| Amoxicillin                               | 46                                       | 1872                                | 57,879                              | 15,951,102                     | 6.77 (5.05–9.07)      |
| Benzylpenicillin                          | 1                                        | 1917                                | 1620                                | 16,007,361                     | 5.15 (0.73–36.63)     |
| Benzathine benzylpenicillin               | 1                                        | 1917                                | 559                                 | 16,008,422                     | 14.94 (2.10–106.3)    |
| Oxacillin                                 | 2                                        | 1916                                | 901                                 | 16,008,080                     | 18.55 (4.63–74.32)    |
| Ampicillin and beta-lactamase inhibitor   | 9                                        | 1909                                | 2171                                | 16,006,810                     | 34.76 (18.03–67.00)   |
| Amoxicillin and beta-lactamase inhibitor  | 24                                       | 1894                                | 22,136                              | 15,986,845                     | 9.15 (6.12–13.69)     |
| Piperacillin and beta-lactamase inhibitor | 55                                       | 1863                                | 19,733                              | 15,989,248                     | 23.92 (18.29–31.29)   |
| Cefalexin                                 | 3                                        | 1915                                | 15,331                              | 15,993,650                     | 1.63 (0.53–5.07)      |
| Cefazolin                                 | 22                                       | 1896                                | 8541                                | 16,000,440                     | 21.74 (14.27–33.11)   |
| Cefoxitin                                 | 4                                        | 1914                                | 960                                 | 16,008,021                     | 34.85 (13.04–93.14)   |
| Cefuroxime                                | 48                                       | 1870                                | 12,183                              | 15,996,798                     | 33.70 (25.29–44.91)   |
| Cefaclor                                  | 4                                        | 1914                                | 1187                                | 16,007,794                     | 28.18 (10.55–75.30)   |
| Cefotetan                                 | 1                                        | 1917                                | 102                                 | 16,008,879                     | 81.87 (11.42–587.14)  |
| Cefotaxime                                | 7                                        | 1911                                | 3314                                | 16,005,667                     | 17.69 (8.42–37.19)    |
| Ceftazidime                               | 22                                       | 1896                                | 5526                                | 16,003,455                     | 33.60 (22.05–51.20)   |
| Ceftriaxone                               | 73                                       | 1845                                | 26,428                              | 15,982,553                     | 23.93 (18.93–30.24)   |
| Cefixime                                  | 9                                        | 1909                                | 2013                                | 16,006,968                     | 37.49 (19.45–72.27)   |
| Cefpodoxime                               | 7                                        | 1911                                | 717                                 | 16,008,264                     | 81.78 (38.8–172.4)    |
| Cefdinir                                  | 5                                        | 1913                                | 5823                                | 16,003,158                     | 7.18 (2.99–17.28)     |
| Cefepime                                  | 31                                       | 1887                                | 10,953                              | 15,998,028                     | 24.00 (16.82–34.24)   |
| Aztreonam                                 | 9                                        | 1909                                | 6096                                | 16,002,885                     | 12.38 (6.43–23.83)    |
| Meropenem                                 | 71                                       | 1847                                | 21,011                              | 15,987,970                     | 29.25 (23.07–37.09)   |
| Ertapenem                                 | 2                                        | 1916                                | 5327                                | 16,003,654                     | 3.14 (0.78–12.55)     |
| Imipenem and cilastatin                   | 22                                       | 1896                                | 3409                                | 16,005,572                     | 54.48 (35.74–83.05)   |
| Ceftaroline fosamil                       | 1                                        | 1917                                | 505                                 | 16,008,476                     | 16.54 (2.32–117.68)   |

|                  |     |      |        |            |                      |
|------------------|-----|------|--------|------------|----------------------|
| Trimethoprim     | 11  | 1907 | 9121   | 15,999,860 | 10.12 (5.59–18.31)   |
| Sulfadiazine     | 2   | 1916 | 1254   | 16,007,727 | 13.32 (3.33–53.38)   |
| Sulfamethoxazole | and |      |        |            |                      |
| trimethoprim     | 33  | 1885 | 64,580 | 15,944,401 | 4.32 (3.06–6.10)     |
| Erythromycin     | 17  | 1901 | 14,696 | 15,994,285 | 9.73 (6.04–15.69)    |
| Clarithromycin   | 65  | 1853 | 26,911 | 15,982,070 | 20.83 (16.26–26.69)  |
| Azithromycin     | 30  | 1888 | 38,194 | 15,970,787 | 6.64 (4.63–9.53)     |
| Clindamycin      | 71  | 1847 | 27,521 | 15,981,460 | 22.32 (17.61–28.30)  |
| Lincomycin       | 2   | 1916 | 235    | 16,008,746 | 71.11 (17.67–286.22) |
| Streptomycin     | 2   | 1916 | 1004   | 16,007,977 | 16.64 (4.15–66.69)   |
| Tobramycin       | 16  | 1902 | 19613  | 15,989,368 | 6.86 (4.19–11.22)    |
| Gentamicin       | 22  | 1896 | 12,497 | 15,996,484 | 14.85 (9.75–22.62)   |
| Amikacin         | 13  | 1905 | 11,707 | 15,997,274 | 9.32 (5.40–16.09)    |
| Ofloxacin        | 7   | 1911 | 5281   | 16,003,700 | 11.10 (5.28–23.33)   |
| Ciprofloxacin    | 110 | 1808 | 78,326 | 15,930,655 | 12.37 (10.21–15.00)  |
| Levofloxacin     | 71  | 1847 | 44,782 | 15,964,199 | 13.70 (10.81–17.37)  |
| Moxifloxacin     | 7   | 1911 | 11,955 | 15,997,026 | 4.90 (2.33–10.30)    |
| Gatifloxacin     | 2   | 1916 | 1601   | 16,007,380 | 10.44 (2.61–41.80)   |
| Vancomycin       | 164 | 1754 | 47,661 | 15,961,320 | 31.31 (26.67–36.76)  |
| Polymyxin B      | 4   | 1914 | 985    | 16,007,996 | 33.96 (12.71–90.77)  |
| Metronidazole    | 205 | 1713 | 51,725 | 15,957,256 | 36.92 (31.93–42.68)  |
| Tinidazole       | 4   | 1914 | 357    | 16,008,624 | 93.71 (34.94–251.32) |
| Nitrofurantoin   | 1   | 1917 | 2650   | 16,006,331 | 3.15 (0.44–22.39)    |
| Fosfomycin       | 2   | 1916 | 641    | 16,008,340 | 26.07 (6.50–104.54)  |
| Linezolid        | 25  | 1893 | 20,415 | 15,988,566 | 10.34 (6.97–15.35)   |
| Daptomycin       | 6   | 1912 | 11,099 | 15,997,882 | 4.52 (2.03–10.08)    |
| Tedizolid        | 1   | 1917 | 501    | 16,008,480 | 16.67 (2.34–118.63)  |

Note: Signal detection results for no report of target drug-AE combination (a = 0) is omitted.

Abbreviations: AE, adverse event; CI, confidence interval; ROR, reporting odd ratio.
